# Supplementary material for: A Cuproptosis-Related lncRNAs Signature Could Accurately Predict Prognosis in Patients with Clear Cell Renal Cell Carcinoma
Source: Hindawi journal article supplement (doi:10.1155/2022/4673514), 2022-12-22

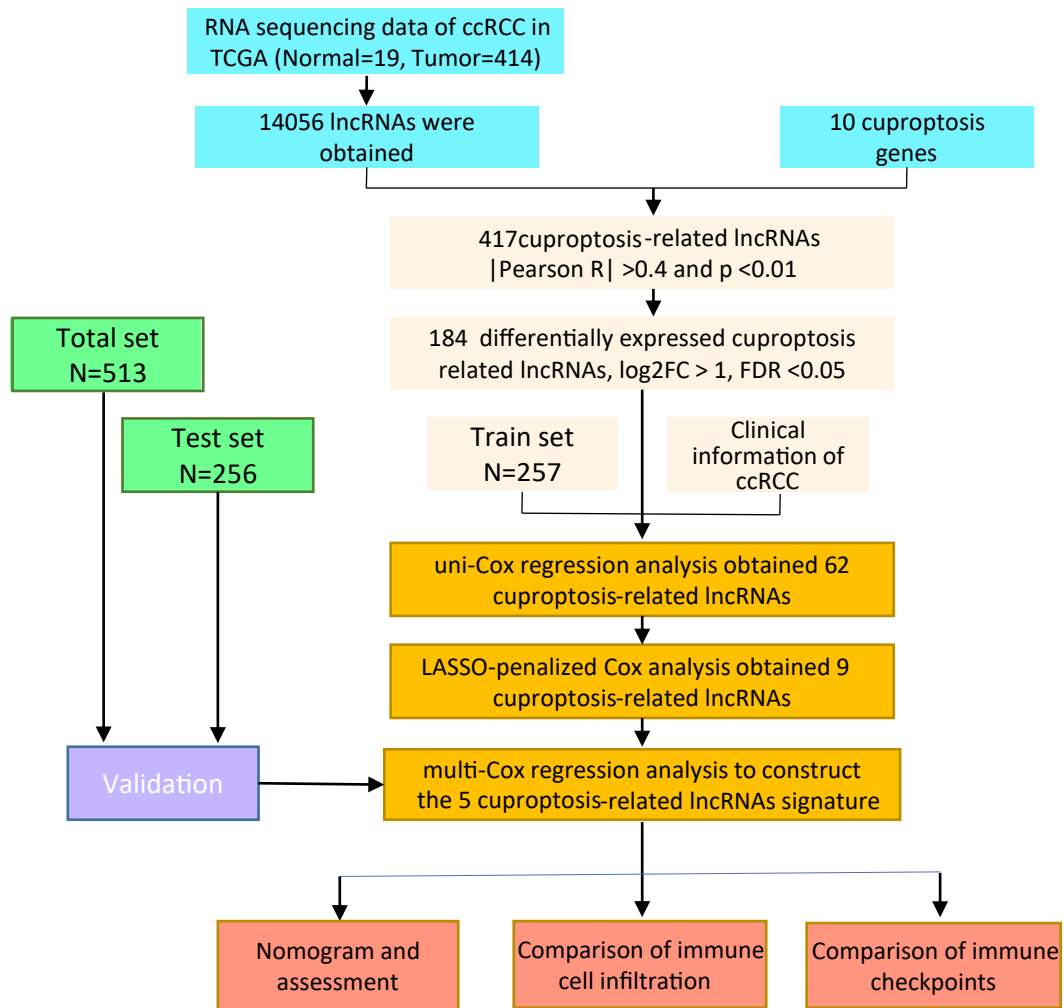

Supplement: f1 [file 4673514.f1.pdf]
