# Supplementary material for: A Cuproptosis-Related lncRNAs Signature Could Accurately Predict Prognosis in Patients with Clear Cell Renal Cell Carcinoma
Source: Anal Cell Pathol (Amst). 2022 Dec 22;2022:4673514. doi: 10.1155/2022/4673514 (PMC9800904; doi:10.1155/2022/4673514)
Supplement: Supplementary Materials — Supplementary Table S1: 5 cuproptosis-related lncRNAs (FOXD2-AS1, LINC00460, AC091212.1, AC007365.1, and AC026401.3) and its regression coefficients derived from the results of multi-Cox regression analysis. [file 4673514.f2.txt]

id	coef
FOXD2-AS1	0.437508525
LINC00460	0.36251265
AC091212.1	1.16218325
AC007365.1	-1.010888758
AC026401.3	0.485122062
