# Supplementary material for: A Cuproptosis-Related lncRNAs Signature Could Accurately Predict Prognosis in Patients with Clear Cell Renal Cell Carcinoma
Source: Anal Cell Pathol (Amst). 2022 Dec 22;2022:4673514. doi: 10.1155/2022/4673514 (PMC9800904; doi:10.1155/2022/4673514)
Supplement: Supplementary Materials — Supplementary Table S2: Correlation between risk score and immune cell infiltration data generated by 7 different platforms. [file 4673514.f3.txt]

immune	cor	pvalue
B cell_TIMER	-0.156248369	0.000382089
T cell CD4+_TIMER	0.126489464	0.004111625
Macrophage_TIMER	-0.156151978	0.000385324
B cell naive_CIBERSORT	-0.240062767	3.70E-08
B cell memory_CIBERSORT	0.178179588	4.94E-05
T cell CD8+_CIBERSORT	0.239034615	4.24E-08
T cell CD4+ memory resting_CIBERSORT	-0.107202351	0.015133817
T cell CD4+ memory activated_CIBERSORT	0.131848733	0.002770692
T cell follicular helper_CIBERSORT	0.307976067	9.85E-13
T cell regulatory (Tregs)_CIBERSORT	0.387152262	8.63E-20
NK cell resting_CIBERSORT	-0.108402837	0.014028847
NK cell activated_CIBERSORT	0.1157028	0.008715084
Monocyte_CIBERSORT	-0.168246617	0.000128805
Macrophage M0_CIBERSORT	0.181433575	3.57E-05
Macrophage M2_CIBERSORT	-0.196103022	7.67E-06
Mast cell activated_CIBERSORT	-0.141934057	0.001267554
Eosinophil_CIBERSORT	-0.129239278	0.003363838
Neutrophil_CIBERSORT	-0.118739028	0.007095038
B cell naive_CIBERSORT-ABS	-0.207377244	2.17E-06
B cell memory_CIBERSORT-ABS	0.177738484	5.16E-05
T cell CD8+_CIBERSORT-ABS	0.199695801	5.17E-06
T cell CD4+ memory activated_CIBERSORT-ABS	0.131833277	0.002773905
T cell follicular helper_CIBERSORT-ABS	0.292686433	1.36E-11
T cell regulatory (Tregs)_CIBERSORT-ABS	0.395393477	1.21E-20
NK cell resting_CIBERSORT-ABS	-0.102594911	0.020115251
NK cell activated_CIBERSORT-ABS	0.153043586	0.000504383
Monocyte_CIBERSORT-ABS	-0.122278548	0.005550698
Macrophage M0_CIBERSORT-ABS	0.184125694	2.72E-05
Mast cell activated_CIBERSORT-ABS	-0.124229202	0.004835561
Neutrophil_CIBERSORT-ABS	-0.101307358	0.021740525
B cell_QUANTISEQ	-0.099924084	0.023612441
Macrophage M1_QUANTISEQ	0.314220045	3.22E-13
Monocyte_QUANTISEQ	0.187018163	2.02E-05
Neutrophil_QUANTISEQ	-0.403862215	1.51E-21
T cell CD4+ (non-regulatory)_QUANTISEQ	-0.20780303	2.06E-06
T cell CD8+_QUANTISEQ	0.240463888	3.50E-08
T cell regulatory (Tregs)_QUANTISEQ	0.172813498	8.35E-05
Myeloid dendritic cell_QUANTISEQ	-0.105721079	0.01660201
uncharacterized cell_QUANTISEQ	0.12389845	0.004950639
T cell CD8+_MCPCOUNTER	0.165083745	0.000172828
cytotoxicity score_MCPCOUNTER	0.212432586	1.20E-06
NK cell_MCPCOUNTER	0.113730743	0.009936518
Myeloid dendritic cell_MCPCOUNTER	-0.14033112	0.001440264
Neutrophil_MCPCOUNTER	-0.3573522	6.74E-17
Endothelial cell_MCPCOUNTER	-0.163860813	0.00019336
Cancer associated fibroblast_MCPCOUNTER	0.315433288	2.58E-13
Myeloid dendritic cell activated_XCELL	0.239510728	3.98E-08
B cell_XCELL	0.123188256	0.005206119
T cell CD4+ naive_XCELL	0.192532051	1.13E-05
T cell CD4+ central memory_XCELL	0.109850828	0.01279101
T cell CD4+ effector memory_XCELL	0.163566324	0.000198635
T cell CD8+ naive_XCELL	0.155960902	0.000391811
T cell CD8+_XCELL	0.182802468	3.11E-05
T cell CD8+ central memory_XCELL	0.146039977	0.000908377
T cell CD8+ effector memory_XCELL	0.237761266	5.03E-08
Class-switched memory B cell_XCELL	0.10034174	0.023033077
Common lymphoid progenitor_XCELL	-0.211453605	1.35E-06
Myeloid dendritic cell_XCELL	0.08849052	0.04514418
Cancer associated fibroblast_XCELL	0.104461278	0.017947345
Granulocyte-monocyte progenitor_XCELL	-0.142631583	0.001198528
Hematopoietic stem cell_XCELL	-0.200316135	4.82E-06
Macrophage M1_XCELL	0.133273134	0.002488714
Mast cell_XCELL	-0.1958896	7.85E-06
B cell memory_XCELL	0.088102798	0.046097804
Monocyte_XCELL	0.111504317	0.011496223
B cell naive_XCELL	0.097981835	0.026475268
T cell NK_XCELL	0.583305788	4.29E-48
Plasmacytoid dendritic cell_XCELL	0.19051568	1.40E-05
T cell CD4+ Th1_XCELL	0.467278198	3.47E-29
T cell CD4+ Th2_XCELL	0.087066278	0.04873056
immune score_XCELL	0.152271116	0.000538867
microenvironment score_XCELL	0.189839658	1.50E-05
B cell_EPIC	-0.153139616	0.000500242
Cancer associated fibroblast_EPIC	0.308985531	8.24E-13
T cell CD4+_EPIC	-0.411883348	2.00E-22
T cell CD8+_EPIC	-0.265500945	1.00E-09
Endothelial cell_EPIC	-0.185281385	2.41E-05
Macrophage_EPIC	0.176035111	6.10E-05
NK cell_EPIC	0.397764724	6.79E-21
uncharacterized cell_EPIC	0.14584838	0.000922788
